# Supplementary material for: Clinical Trial in a Dish: Personalized Stem Cell–Derived Cardiomyocyte Assay Compared With Clinical Trial Results for Two QT‐Prolonging Drugs
Source: PubMed Central journal article supplement — Clin Transl Sci. 2019 Aug 29;12(6):687–97. doi: 10.1111/cts.12674 (PMC6853144; doi:10.1111/cts.12674), 2019-08-29
Supplement: CTS-12-687-s001.pdf [file CTS-12-687-s001.pdf]

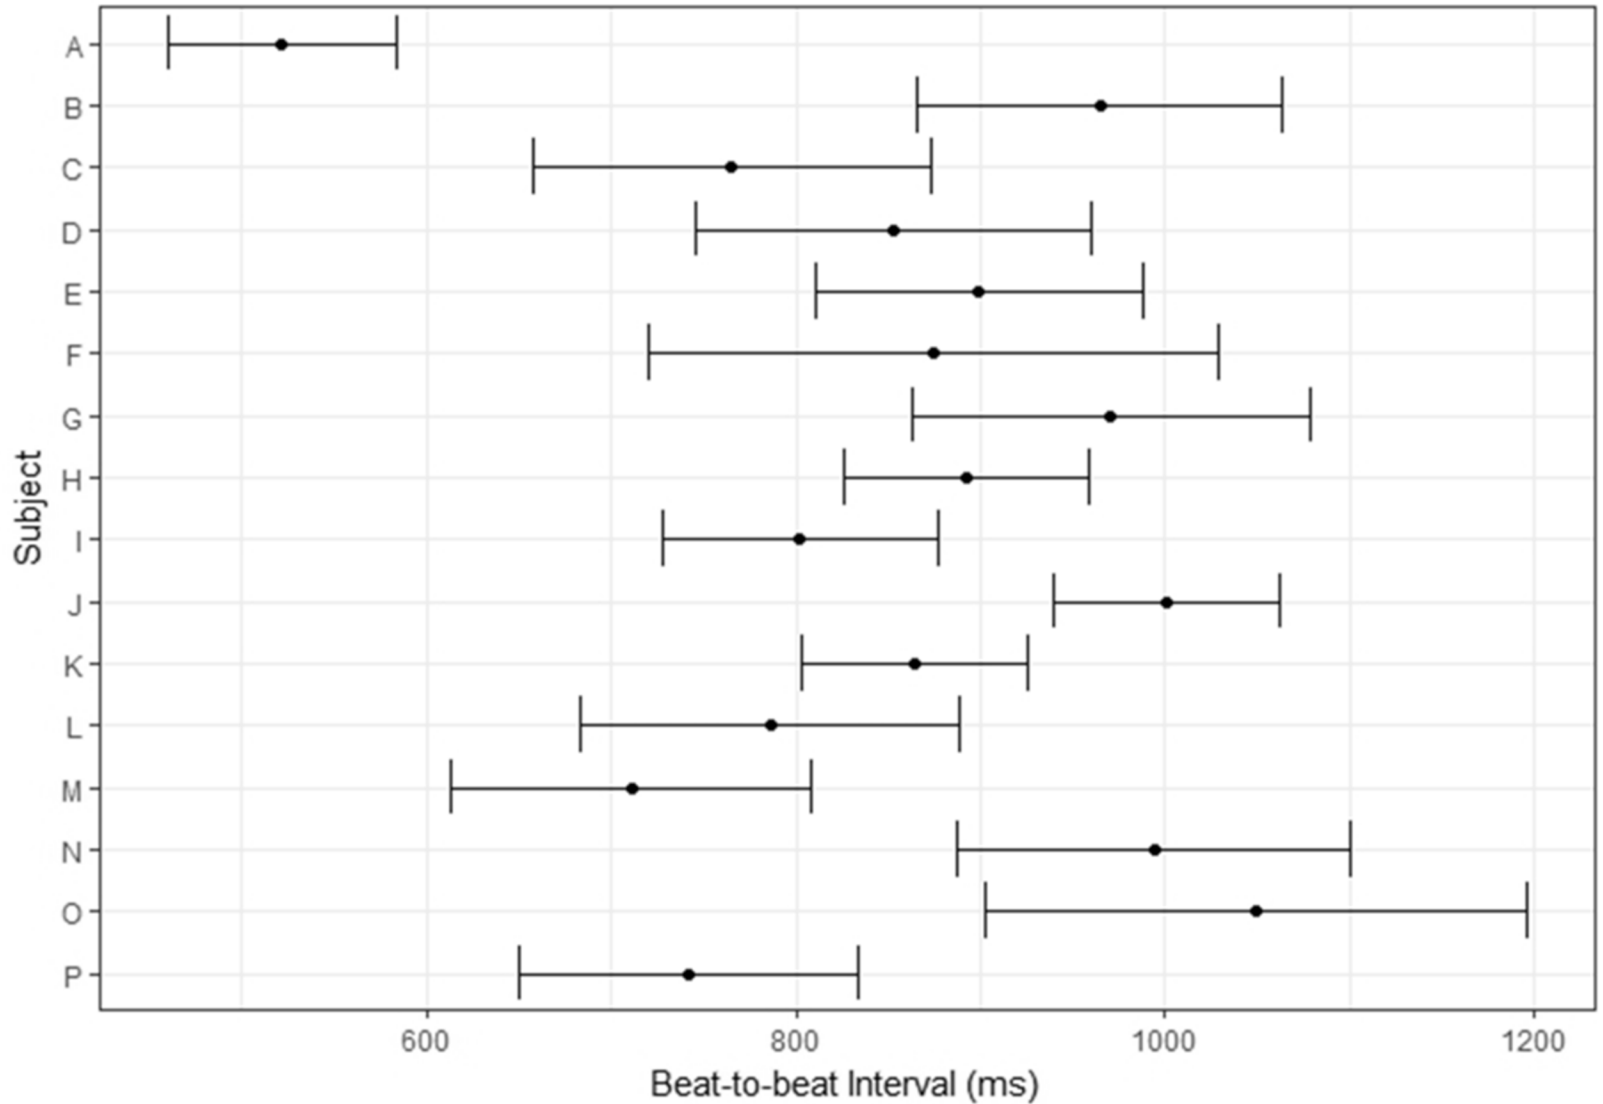

**Fig S1. Mean beating intervals referenced in the experimental procedure.**

Mean beat-to-beat interval at baseline across all wells for each subject. Error bars represent a standard deviation above and below mean. Metrics represented here are related to formula 1 and the analysis is described in the methods.
