# Supplementary material for: Clinical Trial in a Dish: Personalized Stem Cell–Derived Cardiomyocyte Assay Compared With Clinical Trial Results for Two QT‐Prolonging Drugs
Source: PubMed Central journal article supplement — Clin Transl Sci. 2019 Aug 29;12(6):687–97. doi: 10.1111/cts.12674 (PMC6853144; doi:10.1111/cts.12674), 2019-08-29
Supplement: CTS-12-687-s002.pdf [file CTS-12-687-s002.pdf]

**Table S1.  $\Delta\Delta$ APD90 data related to Fig 2.** The moxifloxacin concentration and corresponding  $\Delta\Delta$ APD90c and  $\Delta\Delta$ APD90cF in ms for each subject's iPSC-CM line, as referenced in Results and shown graphically in Fig 2.

| Subject ID | $\Delta\Delta$ APD90c<br>10 $\mu$ M<br>Moxifloxacin | $\Delta\Delta$ APD90cF<br>10 $\mu$ M<br>Moxifloxacin | $\Delta\Delta$ APD90c<br>21 $\mu$ M<br>Moxifloxacin | $\Delta\Delta$ APD90cF<br>21 $\mu$ M<br>Moxifloxacin | $\Delta\Delta$ APD90c<br>70 $\mu$ M<br>Moxifloxacin | $\Delta\Delta$ APD90cF<br>70 $\mu$ M<br>Moxifloxacin | $\Delta\Delta$ APD90c<br>140 $\mu$ M<br>Moxifloxacin | $\Delta\Delta$ APD90cF<br>140 $\mu$ M<br>Moxifloxacin | $\Delta\Delta$ APD90c<br>200 $\mu$ M<br>Moxifloxacin | $\Delta\Delta$ APD90cF<br>200 $\mu$ M<br>Moxifloxacin |
|------------|-----------------------------------------------------|------------------------------------------------------|-----------------------------------------------------|------------------------------------------------------|-----------------------------------------------------|------------------------------------------------------|------------------------------------------------------|-------------------------------------------------------|------------------------------------------------------|-------------------------------------------------------|
| A          | 12.17                                               | 13.59                                                | 21.99                                               | 26.10                                                | 65.59                                               | 85.56                                                | 157.96                                               | 204.05                                                | 273.06                                               | 325.72                                                |
| B          | -0.68                                               | 22.01                                                | 10.71                                               | 33.15                                                | 75.91                                               | 102.40                                               | 159.26                                               | 188.59                                                | 264.76                                               | 284.60                                                |
| C          | 9.00                                                | 23.12                                                | 15.07                                               | 30.35                                                | 65.35                                               | 88.21                                                | 138.82                                               | 170.25                                                | 260.94                                               | 295.05                                                |
| D          | -                                                   | -                                                    | 23.05                                               | 33.17                                                | 67.20                                               | 81.93                                                | 188.29                                               | 201.71                                                | 296.73                                               | 294.99                                                |
| E          | 10.40                                               | 21.82                                                | 24.28                                               | 32.64                                                | 110.21                                              | 124.40                                               | 192.64                                               | 208.85                                                | 321.40                                               | 327.79                                                |
| F          | 9.05                                                | 17.47                                                | 19.57                                               | 31.44                                                | 65.72                                               | 84.72                                                | 141.75                                               | 167.96                                                | 186.28                                               | 215.98                                                |
| G          | 6.82                                                | 20.08                                                | 15.50                                               | 31.39                                                | 50.37                                               | 76.82                                                | 118.79                                               | 152.32                                                | 171.14                                               | 205.27                                                |
| H          | 5.03                                                | 23.44                                                | 32.60                                               | 52.65                                                | 103.30                                              | 128.13                                               | 186.89                                               | 215.51                                                | 253.11                                               | 278.43                                                |
| I          | 14.62                                               | 15.85                                                | 29.42                                               | 32.84                                                | 72.64                                               | 82.30                                                | 130.34                                               | 142.43                                                | 164.62                                               | 177.54                                                |
| J          | 13.41                                               | 19.42                                                | 26.25                                               | 32.71                                                | 72.49                                               | 79.87                                                | 143.55                                               | 151.42                                                | 236.28                                               | 241.56                                                |
| K          | 6.54                                                | 16.15                                                | 14.05                                               | 25.76                                                | 70.90                                               | 89.01                                                | 138.66                                               | 164.16                                                | 206.20                                               | 235.57                                                |
| L          | -                                                   | -                                                    | 21.04                                               | 23.82                                                | 61.77                                               | 74.54                                                | 142.50                                               | 159.95                                                | 251.04                                               | 268.55                                                |
| M          | 1.37                                                | 12.05                                                | 9.88                                                | 23.88                                                | 71.62                                               | 94.07                                                | 143.27                                               | 176.83                                                | 178.06                                               | 216.05                                                |
| N          | 11.04                                               | 24.84                                                | 20.80                                               | 35.36                                                | 76.86                                               | 88.90                                                | 170.77                                               | 179.17                                                | 284.45                                               | 283.50                                                |
| O          | 6.90                                                | 45.97                                                | 25.15                                               | 64.97                                                | 81.17                                               | 118.15                                               | 171.60                                               | 198.92                                                | 258.00                                               | 278.39                                                |
| P          | -                                                   | -                                                    | 6.31                                                | 27.78                                                | 47.46                                               | 73.82                                                | 166.91                                               | 208.13                                                | 245.90                                               | 290.72                                                |
