# Supplementary material for: Clinical Trial in a Dish: Personalized Stem Cell–Derived Cardiomyocyte Assay Compared With Clinical Trial Results for Two QT‐Prolonging Drugs
Source: PubMed Central journal article supplement — Clin Transl Sci. 2019 Aug 29;12(6):687–97. doi: 10.1111/cts.12674 (PMC6853144; doi:10.1111/cts.12674), 2019-08-29
Supplement: CTS-12-687-s003.pdf [file CTS-12-687-s003.pdf]

**Table S2.  $\Delta\Delta$ APD90 data related to Fig 3.** The dofetilide concentration and corresponding  $\Delta\Delta$ APD90c and  $\Delta\Delta$ APD90cF in ms for each subject's iPSC-CM line, as referenced in Results and shown graphically in Fig 3.

| Subject ID | $\Delta\Delta$ APD90c<br>0.5 nM<br>Dofetilide | $\Delta\Delta$ APD90cF<br>0.5 nM<br>Dofetilide | $\Delta\Delta$ APD90c<br>1 nM<br>Dofetilide | $\Delta\Delta$ APD90cF<br>1 nM<br>Dofetilide | $\Delta\Delta$ APD90c<br>2 nM<br>Dofetilide | $\Delta\Delta$ APD90cF<br>2 nM<br>Dofetilide | $\Delta\Delta$ APD90c<br>4 nM<br>Dofetilide | $\Delta\Delta$ APD90cF<br>4 nM<br>Dofetilide | $\Delta\Delta$ APD90c<br>8 nM<br>Dofetilide | $\Delta\Delta$ APD90cF<br>8 nM<br>Dofetilide |
|------------|-----------------------------------------------|------------------------------------------------|---------------------------------------------|----------------------------------------------|---------------------------------------------|----------------------------------------------|---------------------------------------------|----------------------------------------------|---------------------------------------------|----------------------------------------------|
| A          | 27.04                                         | 25.68                                          | 28.32                                       | 31.15                                        | 36.75                                       | 41.40                                        | 48.01                                       | 58.16                                        | 68.91                                       | 84.84                                        |
| B          | 3.38                                          | 4.39                                           | 9.07                                        | 12.64                                        | 10.45                                       | 16.38                                        | 14.89                                       | 27.41                                        | 24.67                                       | 40.21                                        |
| C          | 7.99                                          | 7.81                                           | 18.64                                       | 16.32                                        | 24.38                                       | 25.45                                        | 47.04                                       | 47.14                                        | 50.25                                       | 49.84                                        |
| D          | -                                             | -                                              | 18.61                                       | 19.50                                        | 27.40                                       | 27.68                                        | 40.36                                       | 41.93                                        | 48.90                                       | 51.72                                        |
| E          | 36.19                                         | 30.40                                          | 59.62                                       | 52.09                                        | -                                           | -                                            | 64.70                                       | 61.62                                        | 73.28                                       | 72.80                                        |
| F          | 9.35                                          | 7.89                                           | 19.74                                       | 17.89                                        | 27.47                                       | 26.05                                        | 44.69                                       | 43.71                                        | 55.95                                       | 55.11                                        |
| G          | 11.32                                         | 6.12                                           | 23.44                                       | 17.04                                        | 40.26                                       | 29.17                                        | 65.01                                       | 56.79                                        | 89.21                                       | 83.02                                        |
| H          | 14.29                                         | 15.85                                          | 20.60                                       | 22.51                                        | 35.48                                       | 39.60                                        | 47.70                                       | 55.75                                        | 55.04                                       | 66.95                                        |
| I          | 21.20                                         | 21.14                                          | 31.60                                       | 32.33                                        | -                                           | -                                            | 44.63                                       | 52.27                                        | 40.59                                       | 45.68                                        |
| J          | 14.29                                         | 11.97                                          | 22.93                                       | 21.96                                        | 31.43                                       | 29.99                                        | 48.22                                       | 53.56                                        | 50.59                                       | 58.67                                        |
| K          | 29.60                                         | 22.03                                          | 44.46                                       | 40.62                                        | -                                           | -                                            | 55.42                                       | 50.74                                        | 75.70                                       | 77.39                                        |
| L          | 11.69                                         | 9.99                                           | 22.96                                       | 21.09                                        | 40.49                                       | 38.60                                        | 61.73                                       | 62.07                                        | 117.78                                      | 127.41                                       |
| M          | 4.68                                          | 4.71                                           | 10.75                                       | 11.75                                        | -                                           | -                                            | 38.47                                       | 45.50                                        | 49.59                                       | 63.18                                        |
| N          | 16.73                                         | 18.74                                          | 27.35                                       | 30.85                                        | 28.60                                       | 30.69                                        | 45.13                                       | 56.36                                        | 78.69                                       | 102.85                                       |
| O          | 21.00                                         | 22.74                                          | -                                           | -                                            | 38.63                                       | 42.83                                        | 59.32                                       | 70.48                                        | 73.73                                       | 88.73                                        |
| P          | -                                             | -                                              | 18.58                                       | 23.88                                        | 36.11                                       | 40.36                                        | 39.78                                       | 46.73                                        | 31.69                                       | 39.19                                        |
