# Supplementary material for: Clinical Trial in a Dish: Personalized Stem Cell–Derived Cardiomyocyte Assay Compared With Clinical Trial Results for Two QT‐Prolonging Drugs
Source: PubMed Central journal article supplement — Clin Transl Sci. 2019 Aug 29;12(6):687–97. doi: 10.1111/cts.12674 (PMC6853144; doi:10.1111/cts.12674), 2019-08-29
Supplement: CTS-12-687-s004.pdf [file CTS-12-687-s004.pdf]

**Table S3. Metrics used in formula 1.** Slopes and intercepts from the subject specific linear fitting of baseline APD and beating interval, described in Experimental Procedures. Slopes were extracted for use in calculating APDc as shown in Formula 1.

| Subject ID | Slope | Intercept |
|------------|-------|-----------|
| A          | 0.203 | 97.074    |
| B          | 0.102 | 181.391   |
| C          | 0.177 | 152.571   |
| D          | 0.126 | 162.258   |
| E          | 0.161 | 154.043   |
| F          | 0.148 | 119.090   |
| G          | 0.226 | 134.009   |
| H          | 0.127 | 159.990   |
| I          | 0.135 | 144.313   |
| J          | 0.124 | 153.071   |
| K          | 0.148 | 81.565    |
| L          | 0.170 | 146.639   |
| M          | 0.165 | 145.354   |
| N          | 0.083 | 205.729   |
| O          | 0.098 | 237.449   |
| P          | 0.180 | 150.733   |
